# Supplementary material
Source: PubMed Central journal article supplement (PMC3169660)
Supplement: supp_bhr013_Supplementary_Tables_1-2.pdf [file supp_bhr013_Supplementary_Tables_1-2.pdf]

Table 1. Regional Surface Area Measures Adjusted for Age and Site: Parameter Estimates under Bivariate Models (AE Influences on Total Surface Area and Either ACE or AE Influences on Regional Surface Area) and Tests of Submodels

| Region of Interest            | Model Comparisons   |        |                                       |              |             |           |                   |                                  |                    |      |                            |                            |              |             |              |
|-------------------------------|---------------------|--------|---------------------------------------|--------------|-------------|-----------|-------------------|----------------------------------|--------------------|------|----------------------------|----------------------------|--------------|-------------|--------------|
|                               | Parameter Estimates |        |                                       |              |             |           |                   |                                  | Against Model with |      |                            | Parameter Estimates with A |              |             |              |
|                               | rMZ                 | rDZ    | with A, C, and E Influences on Region |              |             |           |                   | A, C, and E Influences on Region |                    |      | and E Influences on Region |                            |              |             |              |
|                               | A                   | 95% CI | C                                     | 95% CI       | E           | 95% CI    | no A <sup>1</sup> | no C <sup>2</sup>                | no AC <sup>3</sup> | A    | 95% CI                     | E                          | 95% CI       |             |              |
| <i>Frontal lobe</i>           |                     |        |                                       |              |             |           |                   |                                  |                    |      |                            |                            |              |             |              |
| Superior frontal gyrus-L      | 0.79                | 0.45   | <b>0.79</b>                           | (0.64; 0.84) | <b>0.00</b> | (0; 0.11) | <b>0.21</b>       | (0.16; 0.28)                     | <0.0001            | 1.00 | <0.0001                    | <b>0.79</b>                | (0.72; 0.84) | <b>0.21</b> | (0.16; 0.28) |
| Superior frontal gyrus-R      | 0.77                | 0.48   | <b>0.73</b>                           | (0.63; 0.83) | <b>0.05</b> | (0; 0.12) | <b>0.22</b>       | (0.16; 0.29)                     | <0.0001            | 0.36 | <0.0001                    | <b>0.79</b>                | (0.72; 0.84) | <b>0.21</b> | (0.16; 0.28) |
| <i>Middle frontal gyrus</i>   |                     |        |                                       |              |             |           |                   |                                  |                    |      |                            |                            |              |             |              |
| Rostral division-L            | 0.61                | 0.26   | <b>0.59</b>                           | (0.43; 0.69) | <b>0.00</b> | (0; 0.11) | <b>0.41</b>       | (0.31; 0.52)                     | <0.0001            | 1.00 | <0.0001                    | <b>0.59</b>                | (0.48; 0.69) | <b>0.41</b> | (0.31; 0.52) |
| Rostral division-R            | 0.58                | 0.45   | <b>0.57</b>                           | (0.41; 0.67) | <b>0.00</b> | (0; 0.12) | <b>0.43</b>       | (0.33; 0.54)                     | <0.0001            | 1.00 | <0.0001                    | <b>0.57</b>                | (0.46; 0.67) | <b>0.43</b> | (0.33; 0.54) |
| Caudal division-L             | 0.65                | 0.39   | <b>0.64</b>                           | (0.37; 0.72) | <b>0.00</b> | (0; 0.21) | <b>0.36</b>       | (0.28; 0.47)                     | <0.0001            | 1.00 | <0.0001                    | <b>0.64</b>                | (0.53; 0.72) | <b>0.36</b> | (0.28; 0.47) |
| Caudal division-R             | 0.59                | 0.21   | <b>0.55</b>                           | (0.4; 0.65)  | <b>0.00</b> | (0; 0.1)  | <b>0.45</b>       | (0.35; 0.57)                     | <0.0001            | 1.00 | <0.0001                    | <b>0.55</b>                | (0.43; 0.65) | <b>0.45</b> | (0.35; 0.57) |
| <i>Inferior frontal gyrus</i> |                     |        |                                       |              |             |           |                   |                                  |                    |      |                            |                            |              |             |              |
| Pars opercularis-L            | 0.47                | 0.15   | <b>0.45</b>                           | (0.2; 0.57)  | <b>0.00</b> | (0; 0.22) | <b>0.55</b>       | (0.43; 0.68)                     | <0.0001            | 1.00 | <0.0001                    | <b>0.45</b>                | (0.32; 0.57) | <b>0.55</b> | (0.43; 0.68) |
| Pars opercularis-R            | 0.48                | 0.19   | <b>0.47</b>                           | (0.25; 0.58) | <b>0.00</b> | (0; 0.18) | <b>0.53</b>       | (0.42; 0.67)                     | <0.0001            | 1.00 | <0.0001                    | <b>0.47</b>                | (0.33; 0.58) | <b>0.53</b> | (0.42; 0.67) |
| Pars triangularis-L           | 0.40                | 0.13   | <b>0.38</b>                           | (0.16; 0.51) | <b>0.00</b> | (0; 0.18) | <b>0.62</b>       | (0.49; 0.77)                     | <0.0001            | 1.00 | <0.0001                    | <b>0.38</b>                | (0.23; 0.51) | <b>0.62</b> | (0.49; 0.77) |
| Pars triangularis-R           | 0.35                | 0.06   | <b>0.33</b>                           | (0.08; 0.48) | <b>0.00</b> | (0; 0.18) | <b>0.67</b>       | (0.52; 0.84)                     | <0.0001            | 1.00 | <0.0001                    | <b>0.33</b>                | (0.16; 0.48) | <b>0.67</b> | (0.52; 0.84) |
| Pars orbitalis-L              | 0.21                | 0.00   | <b>0.23</b>                           | (0.15; 0.36) | <b>0.00</b> | (0; 0.08) | <b>0.77</b>       | (0.64; 0.85)                     | <0.0001            | 1.00 | <0.0001                    | <b>0.23</b>                | (0.15; 0.36) | <b>0.77</b> | (0.64; 0.85) |

Pars orbitalis-R 0.45 0.01 **0.38** (0.24; 0.51) **0.00** (0; 0.11) **0.62** (0.49; 0.76) <0.0001 1.00 <0.0001 **0.38** (0.24; 0.51) **0.62** (0.49; 0.76)

*Orbitofrontal cortex*

Lateral division-L 0.56 0.17 **0.53** (0.32; 0.64) **0.00** (0; 0.16) **0.47** (0.36; 0.61) <0.0001 1.00 <0.0001 **0.53** (0.39; 0.64) **0.47** (0.36; 0.61)

Lateral division-R 0.42 0.11 **0.36** (0.23; 0.49) **0.00** (0; 0.13) **0.64** (0.51; 0.76) <0.0001 1.00 <0.0001 **0.36** (0.24; 0.49) **0.64** (0.51; 0.76)

Medial division-L 0.37 0.13 **0.33** (0.19; 0.47) **0.00** (0; 0.12) **0.67** (0.53; 0.81) <0.0001 1.00 <0.0001 **0.33** (0.19; 0.47) **0.67** (0.53; 0.81)

Medial division-R\* 0.40 0.29 **0.32** (0.21; 0.56) **0.11** (0; 0.22) **0.57** (0.44; 0.7) <0.0001 0.43 <0.0001 **0.45** (0.31; 0.57) **0.55** (0.43; 0.69)

Frontal pole-L 0.14 0.11 **0.13** (0; 0.31) **0.02** (0; 0.24) **0.85** (0.69; 1) 0.4677 0.92 0.2347 **0.15** (0; 0.31) **0.85** (0.69; 1)

Frontal pole-R 0.00 0.01 **0.00** (0; 0.17) **0.00** (0; 0.14) **1.00** (0.83; 1) 0.6603 1.00 0.8423 **0** (0; 0.17) **1** (0.83; 1)

Precentral gyrus-L 0.67 0.45 **0.68** (0.47; 0.76) **0.00** (0; 0.16) **0.32** (0.24; 0.42) <0.0001 1.00 <0.0001 **0.68** (0.59; 0.76) **0.32** (0.24; 0.41)

Precentral gyrus-R\* 0.61 0.37 **0.48** (0.4; 0.68) **0.14** (0; 0.21) **0.38** (0.3; 0.47) <0.0001 0.13 <0.0001 **0.63** (0.53; 0.71) **0.37** (0.29; 0.47)

Paracentral lobule-L\* 0.44 0.22 **0.30** (0.22; 0.54) **0.11** (0; 0.2) **0.59** (0.46; 0.71) <0.0001 0.40 <0.0001 **0.43** (0.29; 0.55) **0.57** (0.45; 0.71)

Paracentral lobule-R\* 0.53 0.36 **0.42** (0.32; 0.66) **0.14** (0; 0.23) **0.44** (0.34; 0.55) <0.0001 0.26 <0.0001 **0.58** (0.46; 0.67) **0.42** (0.33; 0.54)

*Parietal lobe*

Postcentral gyrus-L 0.55 0.29 **0.53** (0.4; 0.64) **0.00** (0; 0.08) **0.47** (0.36; 0.6) <0.0001 1.00 <0.0001 **0.53** (0.4; 0.64) **0.47** (0.36; 0.6)

Postcentral gyrus-R\* 0.54 0.50 **0.43** (0.34; 0.62) **0.16** (0; 0.23) **0.41** (0.33; 0.51) <0.0001 0.06 <0.0001 **0.59** (0.49; 0.68) **0.41** (0.32; 0.51)

Supramarginal gyrus-L 0.60 0.31 **0.55** (0.38; 0.73) **0.09** (0; 0.22) **0.36** (0.27; 0.48) <0.0001 0.42 <0.0001 **0.65** (0.54; 0.73) **0.35** (0.27; 0.46)

Supramarginal gyrus-R 0.52 0.16 **0.49** (0.28; 0.61) **0.00** (0; 0.16) **0.51** (0.39; 0.64) <0.0001 1.00 <0.0001 **0.49** (0.36; 0.61) **0.51** (0.39; 0.64)

Superior parietal cortex-L 0.64 0.25 **0.61** (0.45; 0.7) **0.00** (0; 0.12) **0.39** (0.3; 0.5) <0.0001 1.00 <0.0001 **0.61** (0.5; 0.7) **0.39** (0.3; 0.5)

Superior parietal cortex-R 0.60 0.38 **0.57** (0.33; 0.71) **0.05** (0; 0.25) **0.38** (0.29; 0.49) <0.0001 0.68 <0.0001 **0.63** (0.52; 0.71) **0.37** (0.29; 0.48)

Inferior parietal cortex-L 0.48 0.13 **0.48** (0.32; 0.6) **0.00** (0; 0.12) **0.52** (0.4; 0.65) <0.0001 1.00 <0.0001 **0.48** (0.35; 0.6) **0.52** (0.4; 0.65)

Inferior parietal cortex-R 0.62 0.30 **0.65** (0.45; 0.73) **0.00** (0; 0.16) **0.35** (0.27; 0.45) <0.0001 1.00 <0.0001 **0.65** (0.55; 0.73) **0.35** (0.27; 0.45)

|             |      |      |                          |                       |                          |         |      |         |                          |                          |
|-------------|------|------|--------------------------|-----------------------|--------------------------|---------|------|---------|--------------------------|--------------------------|
| Precuneus-L | 0.71 | 0.35 | <b>0.72</b> (0.57; 0.79) | <b>0.00</b> (0; 0.11) | <b>0.28</b> (0.21; 0.37) | <0.0001 | 1.00 | <0.0001 | <b>0.72</b> (0.63; 0.79) | <b>0.28</b> (0.21; 0.37) |
| Precuneus-R | 0.56 | 0.36 | <b>0.51</b> (0.42; 0.68) | <b>0.09</b> (0; 0.16) | <b>0.40</b> (0.32; 0.5)  | <0.0001 | 0.33 | <0.0001 | <b>0.6</b> (0.5; 0.69)   | <b>0.4</b> (0.31; 0.5)   |

*Occipital lobe*

|                             |      |      |                          |                       |                          |         |      |         |                          |                          |
|-----------------------------|------|------|--------------------------|-----------------------|--------------------------|---------|------|---------|--------------------------|--------------------------|
| Lingual gyrus-L             | 0.51 | 0.30 | <b>0.53</b> (0.21; 0.64) | <b>0.00</b> (0; 0.26) | <b>0.47</b> (0.36; 0.6)  | <0.0001 | 1.00 | <0.0001 | <b>0.53</b> (0.41; 0.64) | <b>0.47</b> (0.36; 0.6)  |
| Lingual gyrus-R             | 0.49 | 0.31 | <b>0.47</b> (0.24; 0.58) | <b>0.00</b> (0; 0.19) | <b>0.53</b> (0.42; 0.66) | <0.0001 | 1.00 | <0.0001 | <b>0.47</b> (0.34; 0.58) | <b>0.53</b> (0.42; 0.66) |
| Pericalcarine cortex-L      | 0.35 | 0.14 | <b>0.34</b> (0.13; 0.48) | <b>0.00</b> (0; 0.17) | <b>0.66</b> (0.52; 0.82) | <0.0001 | 1.00 | <0.0001 | <b>0.34</b> (0.18; 0.48) | <b>0.66</b> (0.52; 0.82) |
| Pericalcarine cortex-R      | 0.46 | 0.17 | <b>0.44</b> (0.15; 0.56) | <b>0.00</b> (0; 0.25) | <b>0.56</b> (0.44; 0.7)  | <0.0001 | 1.00 | <0.0001 | <b>0.44</b> (0.3; 0.56)  | <b>0.56</b> (0.44; 0.7)  |
| Cuneus-L                    | 0.54 | 0.23 | <b>0.49</b> (0.16; 0.6)  | <b>0.00</b> (0; 0.28) | <b>0.51</b> (0.4; 0.64)  | <0.0001 | 1.00 | <0.0001 | <b>0.49</b> (0.36; 0.6)  | <b>0.51</b> (0.4; 0.64)  |
| Cuneus-R*                   | 0.37 | 0.28 | <b>0.23</b> (0.15; 0.48) | <b>0.14</b> (0; 0.24) | <b>0.64</b> (0.52; 0.76) | <0.0001 | 0.28 | <0.0001 | <b>0.37</b> (0.23; 0.5)  | <b>0.63</b> (0.5; 0.77)  |
| Lateral occipital cortex-L* | 0.56 | 0.41 | <b>0.46</b> (0.27; 0.67) | <b>0.11</b> (0; 0.27) | <b>0.43</b> (0.33; 0.55) | <0.0001 | 0.38 | <0.0001 | <b>0.59</b> (0.47; 0.68) | <b>0.41</b> (0.32; 0.53) |
| Lateral occipital cortex-R  | 0.32 | 0.38 | <b>0.32</b> (0.23; 0.53) | <b>0.08</b> (0; 0.18) | <b>0.60</b> (0.47; 0.72) | <0.0001 | 0.47 | <0.0001 | <b>0.41</b> (0.27; 0.54) | <b>0.59</b> (0.46; 0.73) |

*Temporal cortex*

Lateral aspect

|                           |      |      |                          |                       |                          |         |      |         |                          |                          |
|---------------------------|------|------|--------------------------|-----------------------|--------------------------|---------|------|---------|--------------------------|--------------------------|
| Superior temporal gyrus-L | 0.55 | 0.19 | <b>0.56</b> (0.41; 0.66) | <b>0.00</b> (0; 0.1)  | <b>0.44</b> (0.34; 0.56) | <0.0001 | 1.00 | <0.0001 | <b>0.56</b> (0.44; 0.66) | <b>0.44</b> (0.34; 0.56) |
| Superior temporal gyrus-R | 0.56 | 0.22 | <b>0.57</b> (0.4; 0.67)  | <b>0.00</b> (0; 0.11) | <b>0.43</b> (0.33; 0.56) | <0.0001 | 1.00 | <0.0001 | <b>0.57</b> (0.44; 0.67) | <b>0.43</b> (0.33; 0.56) |
| Middle temporal gyrus-L   | 0.45 | 0.21 | <b>0.38</b> (0.26; 0.57) | <b>0.08</b> (0; 0.2)  | <b>0.54</b> (0.43; 0.67) | <0.0001 | 0.61 | <0.0001 | <b>0.47</b> (0.33; 0.58) | <b>0.53</b> (0.42; 0.67) |
| Middle temporal gyrus-R   | 0.54 | 0.22 | <b>0.49</b> (0.25; 0.64) | <b>0.04</b> (0; 0.23) | <b>0.48</b> (0.36; 0.62) | <0.0001 | 0.79 | <0.0001 | <b>0.53</b> (0.4; 0.64)  | <b>0.47</b> (0.36; 0.6)  |
| Inferior temporal gyrus-L | 0.43 | 0.14 | <b>0.40</b> (0.19; 0.53) | <b>0.00</b> (0; 0.16) | <b>0.60</b> (0.47; 0.76) | <0.0001 | 1.00 | <0.0001 | <b>0.4</b> (0.24; 0.53)  | <b>0.6</b> (0.47; 0.76)  |

|                              |      |      |                          |                       |                          |         |      |         |                          |                          |
|------------------------------|------|------|--------------------------|-----------------------|--------------------------|---------|------|---------|--------------------------|--------------------------|
| Inferior temporal gyrus-R    | 0.46 | 0.19 | <b>0.45</b> (0.24; 0.57) | <b>0.00</b> (0; 0.18) | <b>0.55</b> (0.43; 0.69) | <0.0001 | 1.00 | <0.0001 | <b>0.45</b> (0.31; 0.57) | <b>0.55</b> (0.43; 0.69) |
| Transverse temporal cortex-L | 0.41 | 0.08 | <b>0.39</b> (0.14; 0.51) | <b>0.00</b> (0; 0.23) | <b>0.61</b> (0.49; 0.76) | <0.0001 | 1.00 | <0.0001 | <b>0.39</b> (0.24; 0.51) | <b>0.61</b> (0.49; 0.76) |
| Transverse temporal cortex-R | 0.27 | 0.07 | <b>0.26</b> (0.04; 0.41) | <b>0.00</b> (0; 0.22) | <b>0.74</b> (0.59; 0.91) | <0.0001 | 1.00 | <0.0001 | <b>0.26</b> (0.09; 0.41) | <b>0.74</b> (0.59; 0.91) |
| Banks Sup. Temp. Sulcus-L*   | 0.21 | 0.23 | <b>0.04</b> (0.01; 0.35) | <b>0.15</b> (0; 0.28) | <b>0.80</b> (0.65; 0.93) | 0.0009  | 0.40 | <0.0001 | <b>0</b> (0; 0.36)       | <b>0</b> (0; 0.94)       |
| Banks Sup. Temp. Sulcus-R    | 0.16 | 0.11 | <b>0.18</b> (0.08; 0.34) | <b>0.00</b> (0; 0.13) | <b>0.82</b> (0.66; 0.92) | <0.0001 | 1.00 | <0.0001 | <b>0.18</b> (0.08; 0.34) | <b>0.82</b> (0.66; 0.92) |

### Medial aspect

|                     |      |      |                          |                       |                          |         |      |         |                          |                          |
|---------------------|------|------|--------------------------|-----------------------|--------------------------|---------|------|---------|--------------------------|--------------------------|
| Entorhinal cortex-L | 0.18 | 0.07 | <b>0.16</b> (0.02; 0.33) | <b>0.00</b> (0; 0.17) | <b>0.84</b> (0.67; 0.97) | <0.0001 | 1.00 | <0.0001 | <b>0.16</b> (0.03; 0.33) | <b>0.84</b> (0.67; 0.97) |
| Entorhinal cortex-R | 0.25 | 0.07 | <b>0.26</b> (0.03; 0.42) | <b>0.00</b> (0; 0.22) | <b>0.74</b> (0.58; 0.92) | <0.0001 | 1.00 | <0.0001 | <b>0.26</b> (0.08; 0.42) | <b>0.74</b> (0.58; 0.92) |
| Parahippocampal-L*  | 0.30 | 0.31 | <b>0.14</b> (0.07; 0.42) | <b>0.23</b> (0; 0.34) | <b>0.63</b> (0.51; 0.76) | <0.0001 | 0.05 | <0.0001 | <b>0.39</b> (0.24; 0.52) | <b>0.61</b> (0.48; 0.76) |
| Parahippocampal-R   | 0.28 | 0.10 | <b>0.19</b> (0.07; 0.36) | <b>0.00</b> (0; 0.11) | <b>0.81</b> (0.64; 0.93) | <0.0001 | 1.00 | <0.0001 | <b>0.19</b> (0.07; 0.36) | <b>0.81</b> (0.64; 0.93) |
| Temporal pole-L     | 0.12 | 0.13 | <b>0.09</b> (0.04; 0.27) | <b>0.05</b> (0; 0.17) | <b>0.86</b> (0.73; 0.96) | <0.0001 | 0.67 | <0.0001 | <b>0.13</b> (0.04; 0.28) | <b>0.87</b> (0.72; 0.96) |
| Temporal pole-R     | 0.24 | 0.06 | <b>0.23</b> (0.02; 0.4)  | <b>0.00</b> (0; 0.2)  | <b>0.77</b> (0.6; 0.96)  | <0.0001 | 1.00 | <0.0001 | <b>0.23</b> (0.04; 0.4)  | <b>0.77</b> (0.6; 0.96)  |
| Fusiform gyrus-L    | 0.35 | 0.47 | <b>0.35</b> (0.27; 0.51) | <b>0.09</b> (0; 0.18) | <b>0.56</b> (0.46; 0.68) | <0.0001 | 0.16 | <0.0001 | <b>0.43</b> (0.3; 0.54)  | <b>0.57</b> (0.46; 0.7)  |
| Fusiform gyrus-R    | 0.45 | 0.22 | <b>0.48</b> (0.33; 0.59) | <b>0.00</b> (0; 0.14) | <b>0.52</b> (0.41; 0.64) | <0.0001 | 1.00 | <0.0001 | <b>0.48</b> (0.36; 0.59) | <b>0.52</b> (0.41; 0.64) |

### Cingulate cortex

|                             |      |      |                          |                       |                          |         |      |         |                          |                          |
|-----------------------------|------|------|--------------------------|-----------------------|--------------------------|---------|------|---------|--------------------------|--------------------------|
| Rostral anterior division-L | 0.12 | 0.13 | <b>0.13</b> (0.07; 0.3)  | <b>0.04</b> (0; 0.16) | <b>0.83</b> (0.7; 0.93)  | <0.0001 | 0.50 | <0.0001 | <b>0.15</b> (0.07; 0.3)  | <b>0.85</b> (0.7; 0.93)  |
| Rostral anterior division-R | 0.06 | 0.17 | <b>0.07</b> (0.02; 0.26) | <b>0.06</b> (0; 0.19) | <b>0.87</b> (0.73; 0.97) | <0.0001 | 0.53 | <0.0001 | <b>0.12</b> (0.03; 0.27) | <b>0.88</b> (0.73; 0.97) |
| Caudal anterior division-L  | 0.29 | 0.17 | <b>0.31</b> (0.16; 0.45) | <b>0.00</b> (0; 0.14) | <b>0.69</b> (0.55; 0.83) | <0.0001 | 1.00 | <0.0001 | <b>0.31</b> (0.17; 0.45) | <b>0.69</b> (0.55; 0.83) |
| Caudal anterior division-R  | 0.49 | 0.03 | <b>0.46</b> (0.24; 0.61) | <b>0.00</b> (0; 0.12) | <b>0.54</b> (0.39; 0.72) | <0.0001 | 1.00 | <0.0001 | <b>0.46</b> (0.28; 0.61) | <b>0.54</b> (0.39; 0.72) |

|                               |      |      |                          |                       |                          |         |      |         |                          |                          |
|-------------------------------|------|------|--------------------------|-----------------------|--------------------------|---------|------|---------|--------------------------|--------------------------|
| Rostral posterior division-L  | 0.47 | 0.21 | <b>0.47</b> (0.25; 0.58) | <b>0.00</b> (0; 0.2)  | <b>0.53</b> (0.42; 0.65) | <0.0001 | 1.00 | <0.0001 | <b>0.47</b> (0.35; 0.58) | <b>0.53</b> (0.42; 0.65) |
| Rostral posterior division-R* | 0.50 | 0.30 | <b>0.40</b> (0.27; 0.62) | <b>0.12</b> (0; 0.24) | <b>0.48</b> (0.38; 0.6)  | <0.0001 | 0.47 | <0.0001 | <b>0.53</b> (0.41; 0.63) | <b>0.47</b> (0.37; 0.59) |
| Retrosplenial cortex-L        | 0.53 | 0.24 | <b>0.54</b> (0.32; 0.65) | <b>0.00</b> (0; 0.15) | <b>0.46</b> (0.35; 0.59) | <0.0001 | 1.00 | <0.0001 | <b>0.54</b> (0.41; 0.65) | <b>0.46</b> (0.35; 0.59) |
| Retrosplenial cortex-R        | 0.35 | 0.24 | <b>0.40</b> (0.18; 0.53) | <b>0.00</b> (0; 0.18) | <b>0.60</b> (0.47; 0.77) | <0.0001 | 1.00 | <0.0001 | <b>0.4</b> (0.24; 0.53)  | <b>0.6</b> (0.47; 0.76)  |

---

NOTE: rMZ = phenotypic correlation among monozygotic twins, rDZ = phenotypic correlation among dizygotic twins, A= additive genetic variance, C = shared environmental variance, E = unique environmental variance, CI = confidence interval, L = left, R = right

<sup>1</sup> Testing whether setting parameters  $a_{21}$  and  $a_{22}$  (see Figure 1) to zero significantly reduces model fit. A significant change in fit indicates that a model without genetic influences on the region provides a worse representation of the data, and provides a significance level for the heritability estimate.

<sup>2</sup> Testing whether setting parameters  $c_{21}$  and  $c_{22}$  to zero significantly reduces model fit. A significant change in fit indicates that a model without shared environmental influences on the region fits significantly worse.

<sup>3</sup> Testing whether setting parameters  $a_{21}$ ,  $a_{22}$ ,  $c_{21}$  and  $c_{22}$  to zero significantly reduces model fit. A significant change in fit indicates that a model without genetic and shared environmental influences on the region fits significantly worse.

\*Regions in which the shared environmental estimates are greater than 0.10, warranting caution in interpreting the A effects from an AE model as purely genetic in origin.

Table 2. Regional Surface Area Measures Adjusted for Age and Site and Total Surface Area: Residual Parameter Estimates from Bivariate ACE Model and Tests of Submodels

| Region of Interest            | Model Comparisons |       |                                                                                |           |             |           |             |              |                                                   |                   |                    |                                                                            |              |             |              |  |
|-------------------------------|-------------------|-------|--------------------------------------------------------------------------------|-----------|-------------|-----------|-------------|--------------|---------------------------------------------------|-------------------|--------------------|----------------------------------------------------------------------------|--------------|-------------|--------------|--|
|                               | rMZ rDZ           |       | Residual Parameter Estimates Under Model with A, C, and E Influences on Region |           |             |           |             |              | Against Model with A, C, & E Influences on Region |                   |                    | Residual Parameter Estimates Under Model with A and E Influences on Region |              |             |              |  |
|                               |                   |       | A                                                                              | 95% CI    | C           | 95% CI    | E           | 95% CI       | no A <sup>1</sup>                                 | no C <sup>2</sup> | no AC <sup>3</sup> | A                                                                          | 95% CI       | E           | 95% CI       |  |
|                               |                   |       |                                                                                |           |             |           |             |              |                                                   |                   |                    |                                                                            |              |             |              |  |
| <i>Frontal lobe</i>           |                   |       |                                                                                |           |             |           |             |              |                                                   |                   |                    |                                                                            |              |             |              |  |
| Superior frontal gyrus-L      | 0.38              | 0.23  | <b>0.40</b>                                                                    | (0; 0.54) | <b>0.00</b> | (0; 0.37) | <b>0.59</b> | (0.46; 0.77) | 0.10                                              | 1.00              | <0.0001            | <b>0.41</b>                                                                | (0.25; 0.54) | <b>0.59</b> | (0.46; 0.75) |  |
| Superior frontal gyrus-R*     | 0.27              | 0.26  | <b>0.10</b>                                                                    | (0; 0.45) | <b>0.19</b> | (0; 0.39) | <b>0.71</b> | (0.55; 0.87) | 0.70                                              | 0.36              | 0.001              | <b>0.32</b>                                                                | (0.16; 0.47) | <b>0.68</b> | (0.53; 0.84) |  |
| <i>Middle frontal gyrus</i>   |                   |       |                                                                                |           |             |           |             |              |                                                   |                   |                    |                                                                            |              |             |              |  |
| Rostral division-L            | 0.29              | -0.02 | <b>0.24</b>                                                                    | (0; 0.4)  | <b>0.00</b> | (0; 0.21) | <b>0.76</b> | (0.6; 0.94)  | 0.09                                              | 1.00              | 0.031              | <b>0.24</b>                                                                | (0.06; 0.4)  | <b>0.76</b> | (0.6; 0.94)  |  |
| Rostral division-R            | 0.18              | 0.05  | <b>0.17</b>                                                                    | (0; 0.33) | <b>0.00</b> | (0; 0.24) | <b>0.83</b> | (0.67; 1)    | 0.38                                              | 1.00              | 0.194              | <b>0.17</b>                                                                | (0; 0.33)    | <b>0.83</b> | (0.67; 1)    |  |
| Caudal division-L             | 0.43              | 0.18  | <b>0.41</b>                                                                    | (0; 0.54) | <b>0.00</b> | (0; 0.34) | <b>0.59</b> | (0.46; 0.75) | 0.06                                              | 1.00              | <0.0001            | <b>0.41</b>                                                                | (0.26; 0.54) | <b>0.59</b> | (0.46; 0.74) |  |
| Caudal division-R             | 0.26              | -0.07 | <b>0.19</b>                                                                    | (0; 0.36) | <b>0.00</b> | (0; 0.18) | <b>0.81</b> | (0.64; 0.99) | 0.11                                              | 1.00              | 0.108              | <b>0.19</b>                                                                | (0.01; 0.36) | <b>0.81</b> | (0.64; 0.99) |  |
| <i>Inferior frontal gyrus</i> |                   |       |                                                                                |           |             |           |             |              |                                                   |                   |                    |                                                                            |              |             |              |  |
| Pars opercularis-L            | 0.29              | 0.09  | <b>0.27</b>                                                                    | (0; 0.42) | <b>0.00</b> | (0; 0.3)  | <b>0.73</b> | (0.58; 0.9)  | 0.19                                              | 1.00              | 0.006              | <b>0.27</b>                                                                | (0.11; 0.42) | <b>0.73</b> | (0.58; 0.89) |  |
| Pars opercularis-R            | 0.22              | 0.09  | <b>0.21</b>                                                                    | (0; 0.37) | <b>0.00</b> | (0; 0.27) | <b>0.79</b> | (0.63; 0.96) | 0.33                                              | 1.00              | 0.049              | <b>0.21</b>                                                                | (0.04; 0.37) | <b>0.79</b> | (0.63; 0.96) |  |

|                     |      |       |             |           |             |           |             |              |      |      |       |             |              |             |              |
|---------------------|------|-------|-------------|-----------|-------------|-----------|-------------|--------------|------|------|-------|-------------|--------------|-------------|--------------|
| Pars triangularis-L | 0.28 | -0.02 | <b>0.23</b> | (0; 0.38) | <b>0.00</b> | (0; 0.24) | <b>0.77</b> | (0.62; 0.94) | 0.13 | 1.00 | 0.028 | <b>0.23</b> | (0.06; 0.38) | <b>0.77</b> | (0.62; 0.94) |
| Pars triangularis-R | 0.30 | 0.01  | <b>0.27</b> | (0; 0.43) | <b>0.00</b> | (0; 0.22) | <b>0.73</b> | (0.57; 0.91) | 0.07 | 1.00 | 0.016 | <b>0.27</b> | (0.09; 0.43) | <b>0.73</b> | (0.57; 0.91) |
| Pars orbitalis-L    | 0.01 | -0.12 | <b>0.00</b> | (0; 0.14) | <b>0.00</b> | (0; 0.1)  | <b>1.00</b> | (0.86; 1)    | 1.00 | 1.00 | 1.000 | <b>0</b>    | (0; 0.14)    | <b>1</b>    | (0.86; 1)    |
| Pars orbitalis-R    | 0.17 | -0.07 | <b>0.10</b> | (0; 0.27) | <b>0.00</b> | (0; 0.17) | <b>0.90</b> | (0.73; 1)    | 0.33 | 1.00 | 0.499 | <b>0.1</b>  | (0; 0.27)    | <b>0.9</b>  | (0.73; 1)    |

*Orbitofrontal cortex*

|                       |      |       |             |           |             |           |             |              |      |      |        |             |              |             |              |
|-----------------------|------|-------|-------------|-----------|-------------|-----------|-------------|--------------|------|------|--------|-------------|--------------|-------------|--------------|
| Lateral division-L    | 0.24 | 0.11  | <b>0.24</b> | (0; 0.4)  | <b>0.00</b> | (0; 0.27) | <b>0.76</b> | (0.6; 0.94)  | 0.24 | 1.00 | 0.029  | <b>0.24</b> | (0.06; 0.4)  | <b>0.76</b> | (0.6; 0.94)  |
| Lateral division-R    | 0.11 | -0.01 | <b>0.08</b> | (0; 0.24) | <b>0.00</b> | (0; 0.19) | <b>0.92</b> | (0.76; 1)    | 0.60 | 1.00 | 0.644  | <b>0.08</b> | (0; 0.24)    | <b>0.92</b> | (0.76; 1)    |
| Medial division-L     | 0.15 | -0.06 | <b>0.10</b> | (0; 0.27) | <b>0.00</b> | (0; 0.17) | <b>0.90</b> | (0.73; 1)    | 0.38 | 1.00 | 0.552  | <b>0.1</b>  | (0; 0.27)    | <b>0.9</b>  | (0.73; 1)    |
| Medial division-R*    | 0.19 | 0.20  | <b>0.03</b> | (0; 0.37) | <b>0.17</b> | (0; 0.32) | <b>0.80</b> | (0.63; 0.94) | 0.89 | 0.43 | 0.024  | <b>0.23</b> | (0.06; 0.39) | <b>0.77</b> | (0.61; 0.94) |
| Frontal pole-L        | 0.14 | 0.09  | <b>0.12</b> | (0; 0.31) | <b>0.02</b> | (0; 0.24) | <b>0.86</b> | (0.69; 1)    | 0.65 | 0.92 | 0.250  | <b>0.15</b> | (0; 0.31)    | <b>0.85</b> | (0.69; 1)    |
| Frontal pole-R        | 0.00 | 0.00  | <b>0.00</b> | (0; 0.17) | <b>0.00</b> | (0; 0.14) | <b>1.00</b> | (0.83; 1)    | 1.00 | 1.00 | 1.000  | <b>0</b>    | (0; 0.17)    | <b>1</b>    | (0.83; 1)    |
| Precentral gyrus-L    | 0.34 | 0.17  | <b>0.34</b> | (0; 0.49) | <b>0.00</b> | (0; 0.33) | <b>0.66</b> | (0.51; 0.84) | 0.13 | 1.00 | 0.001  | <b>0.34</b> | (0.17; 0.49) | <b>0.66</b> | (0.51; 0.83) |
| Precentral gyrus-R*   | 0.29 | 0.28  | <b>0.00</b> | (0; 0.38) | <b>0.28</b> | (0; 0.4)  | <b>0.72</b> | (0.59; 0.85) | 1.00 | 0.13 | 0.0003 | <b>0.3</b>  | (0.15; 0.43) | <b>0.7</b>  | (0.57; 0.85) |
| Paracentral lobule-L* | 0.14 | 0.18  | <b>0.00</b> | (0; 0.34) | <b>0.16</b> | (0; 0.29) | <b>0.84</b> | (0.66; 0.97) | 1.00 | 0.40 | 0.066  | <b>0.19</b> | (0.02; 0.35) | <b>0.81</b> | (0.65; 0.98) |
| Paracentral lobule-R* | 0.26 | 0.25  | <b>0.01</b> | (0; 0.41) | <b>0.24</b> | (0; 0.37) | <b>0.75</b> | (0.58; 0.88) | 1.00 | 0.26 | 0.002  | <b>0.29</b> | (0.13; 0.43) | <b>0.71</b> | (0.57; 0.87) |

*Parietal lobe*

|                        |      |       |             |           |             |           |             |              |      |      |         |             |              |             |              |
|------------------------|------|-------|-------------|-----------|-------------|-----------|-------------|--------------|------|------|---------|-------------|--------------|-------------|--------------|
| Postcentral gyrus-L    | 0.14 | -0.01 | <b>0.12</b> | (0; 0.31) | <b>0.00</b> | (0; 0.18) | <b>0.88</b> | (0.69; 1)    | 0.40 | 1.00 | 0.538   | <b>0.12</b> | (0; 0.31)    | <b>0.88</b> | (0.69; 1)    |
| Postcentral gyrus-R*   | 0.30 | 0.33  | <b>0.00</b> | (0; 0.35) | <b>0.31</b> | (0; 0.43) | <b>0.69</b> | (0.57; 0.82) | 1.00 | 0.06 | <0.0001 | <b>0.32</b> | (0.17; 0.45) | <b>0.68</b> | (0.55; 0.83) |
| Supramarginal gyrus-L* | 0.29 | 0.27  | <b>0.15</b> | (0; 0.48) | <b>0.17</b> | (0; 0.4)  | <b>0.68</b> | (0.52; 0.85) | 0.55 | 0.42 | 0.0003  | <b>0.35</b> | (0.18; 0.49) | <b>0.65</b> | (0.51; 0.82) |

|                            |      |       |             |              |             |           |             |              |      |      |         |             |              |             |              |
|----------------------------|------|-------|-------------|--------------|-------------|-----------|-------------|--------------|------|------|---------|-------------|--------------|-------------|--------------|
| Supramarginal gyrus-R      | 0.27 | 0.04  | <b>0.24</b> | (0; 0.4)     | <b>0.00</b> | (0; 0.25) | <b>0.76</b> | (0.6; 0.93)  | 0.13 | 1.00 | 0.024   | <b>0.24</b> | (0.07; 0.4)  | <b>0.76</b> | (0.6; 0.93)  |
| Superior parietal cortex-L | 0.45 | 0.03  | <b>0.38</b> | (0.13; 0.52) | <b>0.00</b> | (0; 0.2)  | <b>0.62</b> | (0.48; 0.77) | 0.01 | 1.00 | <0.0001 | <b>0.38</b> | (0.23; 0.52) | <b>0.62</b> | (0.48; 0.77) |
| Superior parietal cortex-R | 0.41 | 0.23  | <b>0.31</b> | (0; 0.53)    | <b>0.09</b> | (0; 0.42) | <b>0.60</b> | (0.47; 0.77) | 0.21 | 0.68 | <0.0001 | <b>0.41</b> | (0.26; 0.53) | <b>0.59</b> | (0.47; 0.74) |
| Inferior parietal cortex-L | 0.23 | -0.05 | <b>0.17</b> | (0; 0.33)    | <b>0.00</b> | (0; 0.2)  | <b>0.83</b> | (0.67; 1)    | 0.19 | 1.00 | 0.149   | <b>0.17</b> | (0; 0.33)    | <b>0.83</b> | (0.67; 1)    |
| Inferior parietal cortex-R | 0.36 | 0.11  | <b>0.31</b> | (0; 0.45)    | <b>0.00</b> | (0; 0.34) | <b>0.69</b> | (0.55; 0.85) | 0.18 | 1.00 | 0.001   | <b>0.31</b> | (0.16; 0.45) | <b>0.69</b> | (0.55; 0.84) |
| Precuneus-L                | 0.46 | 0.16  | <b>0.46</b> | (0.17; 0.59) | <b>0.00</b> | (0; 0.21) | <b>0.54</b> | (0.41; 0.7)  | 0.01 | 1.00 | <0.0001 | <b>0.46</b> | (0.3; 0.59)  | <b>0.54</b> | (0.41; 0.7)  |
| Precuneus-R*               | 0.22 | 0.17  | <b>0.00</b> | (0; 0.33)    | <b>0.20</b> | (0; 0.33) | <b>0.80</b> | (0.66; 0.93) | 1.00 | 0.33 | 0.016   | <b>0.21</b> | (0.06; 0.35) | <b>0.79</b> | (0.65; 0.94) |

### *Occipital lobe*

|                             |      |      |             |           |             |           |             |              |      |      |         |             |              |             |              |
|-----------------------------|------|------|-------------|-----------|-------------|-----------|-------------|--------------|------|------|---------|-------------|--------------|-------------|--------------|
| Lingual gyrus-L             | 0.39 | 0.17 | <b>0.38</b> | (0; 0.51) | <b>0.00</b> | (0; 0.36) | <b>0.62</b> | (0.49; 0.78) | 0.10 | 1.00 | <0.0001 | <b>0.38</b> | (0.23; 0.51) | <b>0.62</b> | (0.49; 0.77) |
| Lingual gyrus-R             | 0.26 | 0.06 | <b>0.23</b> | (0; 0.38) | <b>0.00</b> | (0; 0.28) | <b>0.77</b> | (0.62; 0.93) | 0.22 | 1.00 | 0.023   | <b>0.23</b> | (0.07; 0.38) | <b>0.77</b> | (0.62; 0.93) |
| Pericalcarine cortex-L      | 0.21 | 0.03 | <b>0.18</b> | (0; 0.35) | <b>0.00</b> | (0; 0.22) | <b>0.82</b> | (0.65; 0.99) | 0.23 | 1.00 | 0.124   | <b>0.18</b> | (0.01; 0.35) | <b>0.82</b> | (0.65; 0.99) |
| Pericalcarine cortex-R      | 0.37 | 0.09 | <b>0.33</b> | (0; 0.47) | <b>0.00</b> | (0; 0.31) | <b>0.67</b> | (0.53; 0.83) | 0.08 | 1.00 | 0.000   | <b>0.33</b> | (0.17; 0.47) | <b>0.67</b> | (0.53; 0.83) |
| Cuneus-L                    | 0.38 | 0.14 | <b>0.36</b> | (0; 0.5)  | <b>0.00</b> | (0; 0.36) | <b>0.64</b> | (0.5; 0.81)  | 0.12 | 1.00 | 0.000   | <b>0.36</b> | (0.2; 0.5)   | <b>0.64</b> | (0.5; 0.8)   |
| Cuneus-R*                   | 0.17 | 0.20 | <b>0.00</b> | (0; 0.32) | <b>0.18</b> | (0; 0.31) | <b>0.82</b> | (0.68; 0.96) | 1.00 | 0.28 | 0.035   | <b>0.19</b> | (0.03; 0.34) | <b>0.81</b> | (0.66; 0.97) |
| Lateral occipital cortex-L* | 0.39 | 0.26 | <b>0.16</b> | (0; 0.49) | <b>0.19</b> | (0; 0.43) | <b>0.64</b> | (0.5; 0.8)   | 0.50 | 0.38 | <0.0001 | <b>0.38</b> | (0.23; 0.51) | <b>0.62</b> | (0.49; 0.77) |
| Lateral occipital cortex-R* | 0.11 | 0.15 | <b>0.00</b> | (0; 0.29) | <b>0.12</b> | (0; 0.26) | <b>0.88</b> | (0.71; 1)    | 1.00 | 0.47 | 0.210   | <b>0.14</b> | (0; 0.31)    | <b>0.86</b> | (0.69; 1)    |

### *Temporal cortex*

Lateral aspect



|                              |      |       |             |           |             |           |             |              |      |      |       |             |              |             |              |
|------------------------------|------|-------|-------------|-----------|-------------|-----------|-------------|--------------|------|------|-------|-------------|--------------|-------------|--------------|
| Superior temporal gyrus-L    | 0.24 | -0.03 | <b>0.18</b> | (0; 0.34) | <b>0.00</b> | (0; 0.21) | <b>0.82</b> | (0.66; 0.99) | 0.18 | 1.00 | 0.120 | <b>0.18</b> | (0.01; 0.34) | <b>0.82</b> | (0.66; 0.99) |
| Superior temporal gyrus-R    | 0.23 | 0.01  | <b>0.20</b> | (0; 0.37) | <b>0.00</b> | (0; 0.22) | <b>0.80</b> | (0.63; 0.98) | 0.16 | 1.00 | 0.083 | <b>0.2</b>  | (0.02; 0.37) | <b>0.8</b>  | (0.63; 0.98) |
| Middle temporal gyrus-L*     | 0.20 | 0.14  | <b>0.06</b> | (0; 0.34) | <b>0.12</b> | (0; 0.3)  | <b>0.82</b> | (0.66; 0.97) | 0.82 | 0.61 | 0.052 | <b>0.2</b>  | (0.03; 0.34) | <b>0.81</b> | (0.66; 0.97) |
| Middle temporal gyrus-R      | 0.26 | 0.19  | <b>0.24</b> | (0; 0.45) | <b>0.06</b> | (0; 0.34) | <b>0.71</b> | (0.55; 0.89) | 0.37 | 0.79 | 0.004 | <b>0.3</b>  | (0.13; 0.45) | <b>0.7</b>  | (0.55; 0.87) |
| Inferior temporal gyrus-L    | 0.23 | 0.02  | <b>0.20</b> | (0; 0.37) | <b>0.00</b> | (0; 0.21) | <b>0.80</b> | (0.63; 0.98) | 0.16 | 1.00 | 0.099 | <b>0.2</b>  | (0.02; 0.37) | <b>0.8</b>  | (0.63; 0.98) |
| Inferior temporal gyrus-R    | 0.22 | 0.10  | <b>0.22</b> | (0; 0.38) | <b>0.00</b> | (0; 0.27) | <b>0.78</b> | (0.62; 0.96) | 0.29 | 1.00 | 0.048 | <b>0.22</b> | (0.05; 0.38) | <b>0.78</b> | (0.62; 0.95) |
| Transverse temporal cortex-L | 0.29 | 0.03  | <b>0.24</b> | (0; 0.39) | <b>0.00</b> | (0; 0.28) | <b>0.76</b> | (0.61; 0.91) | 0.17 | 1.00 | 0.011 | <b>0.24</b> | (0.09; 0.39) | <b>0.76</b> | (0.61; 0.91) |
| Transverse temporal cortex-R | 0.25 | 0.04  | <b>0.21</b> | (0; 0.37) | <b>0.00</b> | (0; 0.25) | <b>0.79</b> | (0.63; 0.97) | 0.22 | 1.00 | 0.068 | <b>0.21</b> | (0.03; 0.37) | <b>0.79</b> | (0.63; 0.97) |
| Banks Sup. Temp. Sulcus-L*   | 0.16 | 0.17  | <b>0.00</b> | (0; 0.32) | <b>0.16</b> | (0; 0.29) | <b>0.84</b> | (0.68; 0.98) | 1.00 | 0.40 | 0.070 | <b>0</b>    | (0; 0.34)    | <b>0</b>    | (0; 0.98)    |
| Banks Sup. Temp. Sulcus-R    | 0.07 | -0.04 | <b>0.04</b> | (0; 0.21) | <b>0.00</b> | (0; 0.15) | <b>0.96</b> | (0.79; 1)    | 0.66 | 1.00 | 0.878 | <b>0.04</b> | (0; 0.21)    | <b>0.96</b> | (0.79; 1)    |

#### Medial aspect

|                     |      |       |             |           |             |           |             |              |      |      |        |             |              |             |              |
|---------------------|------|-------|-------------|-----------|-------------|-----------|-------------|--------------|------|------|--------|-------------|--------------|-------------|--------------|
| Entorhinal cortex-L | 0.14 | -0.02 | <b>0.11</b> | (0; 0.29) | <b>0.00</b> | (0; 0.18) | <b>0.89</b> | (0.71; 1)    | 0.41 | 1.00 | 0.525  | <b>0.11</b> | (0; 0.29)    | <b>0.89</b> | (0.71; 1)    |
| Entorhinal cortex-R | 0.22 | 0.05  | <b>0.21</b> | (0; 0.37) | <b>0.00</b> | (0; 0.24) | <b>0.79</b> | (0.63; 0.98) | 0.22 | 1.00 | 0.080  | <b>0.21</b> | (0.03; 0.37) | <b>0.79</b> | (0.63; 0.97) |
| Parahippocampal-L*  | 0.21 | 0.36  | <b>0.00</b> | (0; 0.33) | <b>0.27</b> | (0; 0.4)  | <b>0.73</b> | (0.59; 0.86) | 1.00 | 0.05 | 0.0004 | <b>0.3</b>  | (0.13; 0.44) | <b>0.7</b>  | (0.56; 0.87) |
| Parahippocampal-R   | 0.19 | -0.18 | <b>0.08</b> | (0; 0.26) | <b>0.00</b> | (0; 0.13) | <b>0.92</b> | (0.74; 1)    | 0.37 | 1.00 | 0.670  | <b>0.08</b> | (0; 0.26)    | <b>0.92</b> | (0.74; 1)    |
| Temporal pole-L     | 0.04 | 0.07  | <b>0.00</b> | (0; 0.2)  | <b>0.05</b> | (0; 0.19) | <b>0.95</b> | (0.8; 1)     | 1.00 | 0.67 | 0.756  | <b>0.05</b> | (0; 0.2)     | <b>0.95</b> | (0.8; 1)     |
| Temporal pole-R     | 0.19 | 0.03  | <b>0.18</b> | (0; 0.37) | <b>0.00</b> | (0; 0.21) | <b>0.82</b> | (0.63; 1)    | 0.23 | 1.00 | 0.184  | <b>0.18</b> | (0; 0.37)    | <b>0.82</b> | (0.63; 1)    |
| Fusiform gyrus-L*   | 0.05 | 0.29  | <b>0.00</b> | (0; 0.23) | <b>0.14</b> | (0; 0.27) | <b>0.86</b> | (0.73; 1)    | 1.00 | 0.16 | 0.146  | <b>0.12</b> | (0; 0.27)    | <b>0.88</b> | (0.73; 1)    |

|                               |       |       |             |              |             |           |             |              |      |      |         |             |              |             |              |
|-------------------------------|-------|-------|-------------|--------------|-------------|-----------|-------------|--------------|------|------|---------|-------------|--------------|-------------|--------------|
| Fusiform gyrus-R              | 0.15  | 0.02  | <b>0.13</b> | (0; 0.28)    | <b>0.00</b> | (0; 0.23) | <b>0.87</b> | (0.72; 1)    | 0.52 | 1.00 | 0.289   | <b>0.13</b> | (0; 0.28)    | <b>0.87</b> | (0.72; 1)    |
| <i>Cingulate cortex</i>       |       |       |             |              |             |           |             |              |      |      |         |             |              |             |              |
| Rostral anterior division-L   | -0.03 | 0.15  | <b>0.00</b> | (0; 0.18)    | <b>0.05</b> | (0; 0.19) | <b>0.95</b> | (0.81; 1)    | 1.00 | 0.50 | 0.756   | <b>0.03</b> | (0; 0.19)    | <b>0.97</b> | (0.81; 1)    |
| Rostral anterior division-R   | 0.03  | 0.12  | <b>0.00</b> | (0; 0.21)    | <b>0.07</b> | (0; 0.2)  | <b>0.93</b> | (0.79; 1)    | 1.00 | 0.53 | 0.644   | <b>0.06</b> | (0; 0.21)    | <b>0.94</b> | (0.79; 1)    |
| Caudal anterior division-L    | 0.14  | -0.04 | <b>0.10</b> | (0; 0.28)    | <b>0.00</b> | (0; 0.17) | <b>0.90</b> | (0.72; 1)    | 0.41 | 1.00 | 0.557   | <b>0.1</b>  | (0; 0.28)    | <b>0.9</b>  | (0.72; 1)    |
| Caudal anterior division-R    | 0.35  | 0.04  | <b>0.35</b> | (0.09; 0.53) | <b>0.00</b> | (0; 0.14) | <b>0.65</b> | (0.47; 0.85) | 0.02 | 1.00 | 0.005   | <b>0.35</b> | (0.15; 0.53) | <b>0.65</b> | (0.47; 0.85) |
| Rostral posterior division-L  | 0.27  | 0.03  | <b>0.22</b> | (0; 0.37)    | <b>0.00</b> | (0; 0.29) | <b>0.78</b> | (0.63; 0.93) | 0.25 | 1.00 | 0.017   | <b>0.22</b> | (0.07; 0.37) | <b>0.78</b> | (0.63; 0.93) |
| Rostral posterior division-R* | 0.27  | 0.18  | <b>0.07</b> | (0; 0.4)     | <b>0.18</b> | (0; 0.36) | <b>0.75</b> | (0.6; 0.9)   | 0.79 | 0.47 | 0.003   | <b>0.27</b> | (0.11; 0.41) | <b>0.73</b> | (0.59; 0.89) |
| Retrosplenial cortex-L        | 0.42  | 0.11  | <b>0.41</b> | (0.1; 0.55)  | <b>0.00</b> | (0; 0.23) | <b>0.59</b> | (0.45; 0.76) | 0.02 | 1.00 | <0.0001 | <b>0.41</b> | (0.24; 0.55) | <b>0.59</b> | (0.45; 0.76) |
| Retrosplenial cortex-R        | 0.19  | 0.07  | <b>0.20</b> | (0; 0.37)    | <b>0.00</b> | (0; 0.24) | <b>0.80</b> | (0.63; 0.99) | 0.29 | 1.00 | 0.105   | <b>0.2</b>  | (0.02; 0.37) | <b>0.8</b>  | (0.63; 0.98) |

NOTE: rMZ = phenotypic correlation among monozygotic twins, rDZ = phenotypic correlation among dizygotic twins, A= additive genetic variance, C = shared environmental variance, E = unique environmental variance, CI = confidence interval, L = left, R = right

<sup>1</sup> Testing whether setting the parameter  $a_{22}$  to zero significantly reduces model fit. A significant change in fit indicates that a model without residual genetic influences on the region provides a worse representation of the data, and provides a significance level for the heritability estimate.

<sup>2</sup> Testing whether setting parameter  $c_{22}$  to zero significantly reduces model fit. A significant change in fit indicates that a model without residual shared environmental influences on the region fits significantly worse.

<sup>3</sup> Testing whether setting parameters  $a_{22}$  and  $c_{22}$  to zero significantly reduces model fit. A significant change in fit indicates that a

model without residual genetic and shared environmental influences on the region fits significantly worse.

\*Regions in which the shared environmental effects are greater than 0.10, warranting caution in interpreting the A effects from an AE as purely genetic in origin.
